# Supplementary material
Source: PubMed Central journal article supplement (PMC6935694)
Supplement: NIHMS1055339-supplement-supp_fig.pdf [file NIHMS1055339-supplement-supp_fig.pdf]

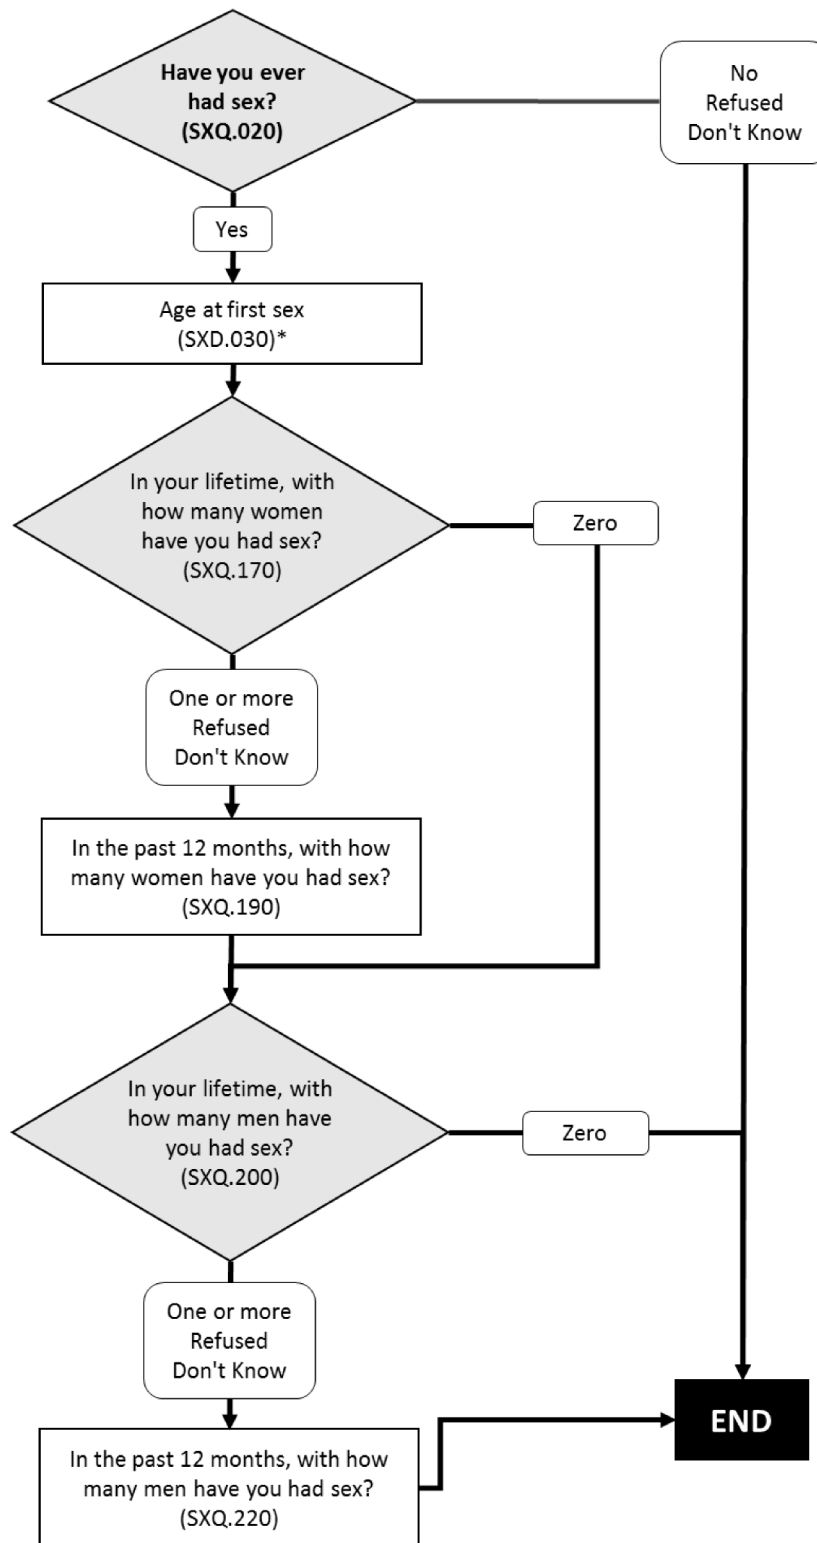

**Supplemental Figure 1: Flowchart of MSM-related sexual behavior variables, NHANES 1999-2000**

MSM = men who have sex with men; NHANES = National Health and Nutrition Examination Survey; males aged 20-59  
 \*Responses to SXD030 (age at first sex) between 1-9 years were recoded as "9 years or younger."

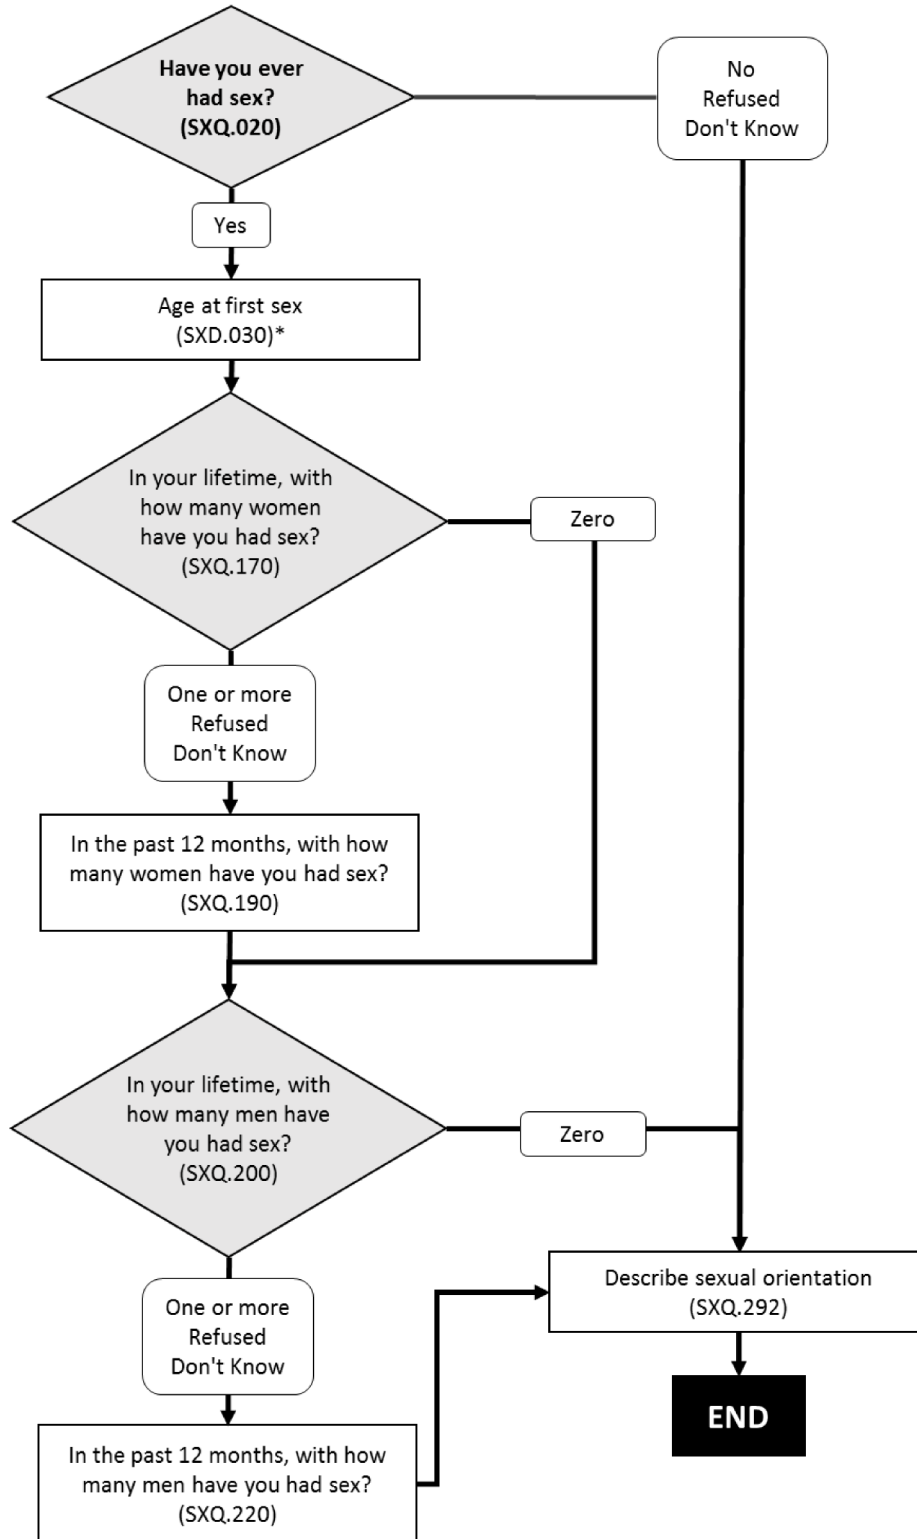

**Supplemental Figure 2: Flowchart of MSM-related sexual behavior variables, NHANES 2001-2004**

MSM = men who have sex with men; NHANES = National Health and Nutrition Examination Survey; males aged 14-59  
 \*Responses to SXD030 (age at first sex) between 1-9 years were recoded as "9 years or younger."

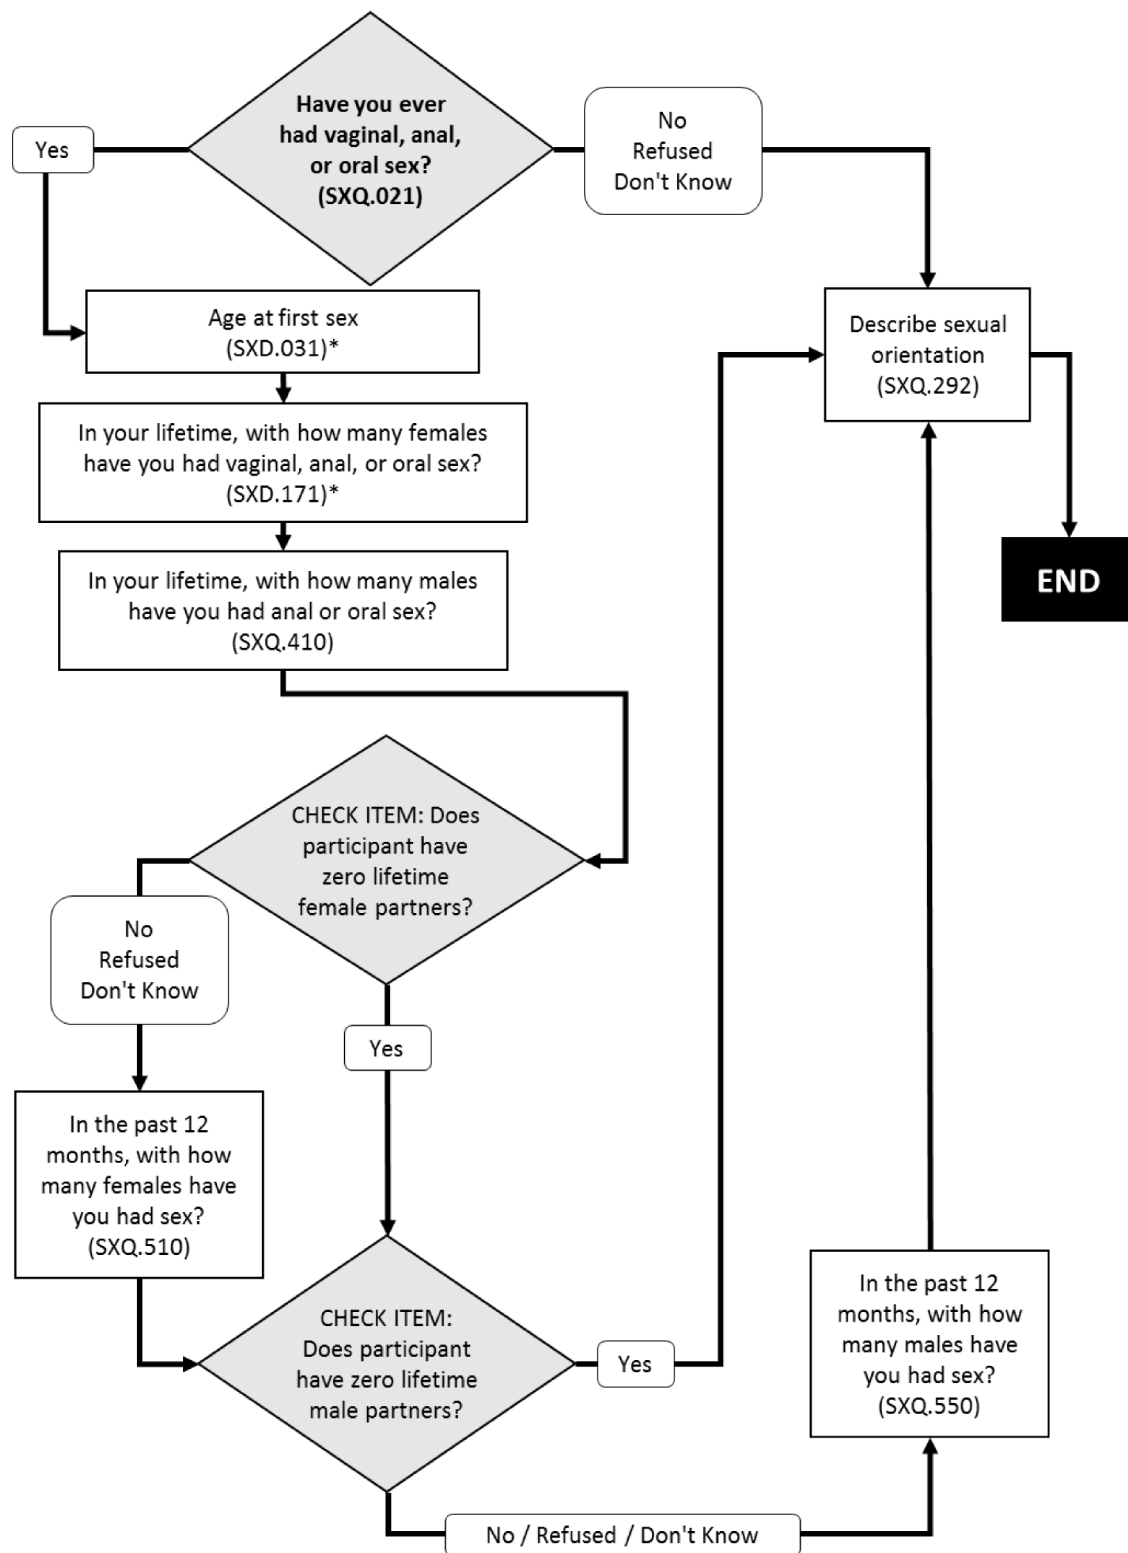

**Supplemental Figure 3: Flowchart of MSM-related sexual behavior variables, NHANES 2005-2006**

MSM = men who have sex with men; NHANES = National Health and Nutrition Examination Survey; males aged 14-59  
 \*Derived variable: SXD031 - Responses to age at first sex that were 9 years or less were grouped and coded as "9 years or younger"; SXD.171 - Responses that were 2000 or more were grouped and coded as "2000 or more."

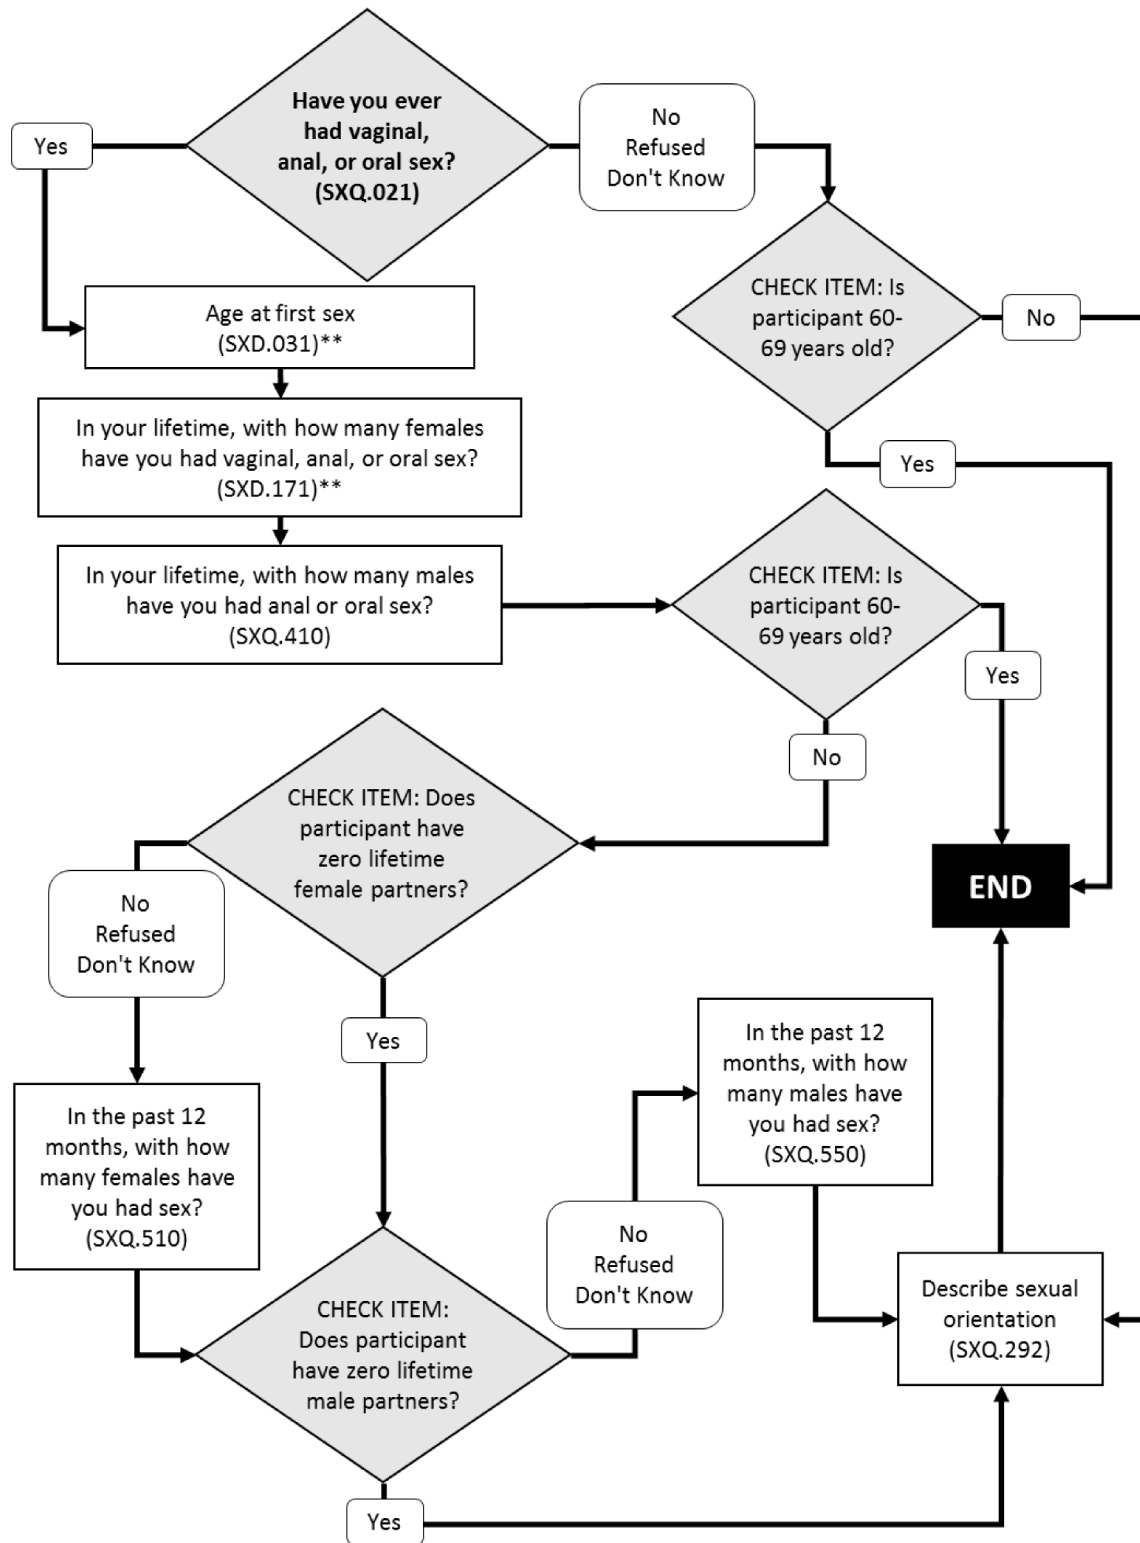

**Supplemental Figure 4: Flowchart of MSM-related sexual behavior variables, NHANES 2007-2008**

MSM = men who have sex with men; NHANES = National Health and Nutrition Examination Survey; males aged 14-69  
 \*Derived variable: SXD031 - Responses to age at first sex that were 9 years or less were grouped and coded as "9 years or younger"; SXD.171 - Responses that were 2000 or more were grouped and coded as "2000 or more."
